# Supplementary material for: Understanding physical literacy in the context of health: a rapid scoping review
Source: Springer Nature journal article supplement (doi:10.1186/s12889-020-09583-8), 2020-10-19
Supplement: MOESM3 [file 18499858]

## Medline OVID

Database(s): **Ovid MEDLINE(R) and Epub Ahead of Print, In-Process & Other Non-Indexed Citations and Daily** 1946 to August 13, 2019

Search Strategy:



Database(s): **Ovid MEDLINE(R) and Epub Ahead of Print, In-Process & Other Non-Indexed Citations and Daily** 1946 to August 30, 2019

Search Strategy:

| #  | Searches                                                                                           | Results |
|----|----------------------------------------------------------------------------------------------------|---------|
| 1  | (physical* adj1 (literacy or literate)).ti,ab.                                                     | 80      |
| 2  | exp Attitude to Health/                                                                            | 396272  |
| 3  | (health adj3 (perceived or perception or self-identified or self-satisfaction or attitude)).ti,ab. | 15531   |
| 4  | exp Public Health/                                                                                 | 7447558 |
| 5  | ((public or population) adj1 health).ti,ab.                                                        | 223823  |
| 6  | exp Population Health/                                                                             | 38048   |
| 7  | exp Physical Fitness/                                                                              | 27870   |
| 8  | (physical adj1 fitness).ti,ab.                                                                     | 8842    |
| 9  | (wellbeing or well-being or wellness).ti,ab.                                                       | 89410   |
| 10 | health.ti,ab.                                                                                      | 1718558 |
| 11 | "Quality of Life"/                                                                                 | 180350  |
| 12 | 2 or 3 or 4 or 5 or 6 or 7 or 8 or 9 or 10 or 11                                                   | 8379950 |
| 13 | 1 and 12                                                                                           | 60      |
| 14 | limit 13 to english language                                                                       | 60      |
| 15 | from 14 keep 1-60                                                                                  | 60      |
